# Supplementary material for: SARS-CoV-2 Epitope Mapping on Microarrays Highlights Strong Immune-Response to N Protein Region
Source: PubMed Central journal article supplement (PMC7827214; doi:10.3390/vaccines9010035), 2021-01-11
Supplement: vaccines-09-00035-s001.pdf [file vaccines-09-00035-s001.pdf]

# SARS-CoV-2 epitope mapping on microarrays highlights strong immune-response to N protein region

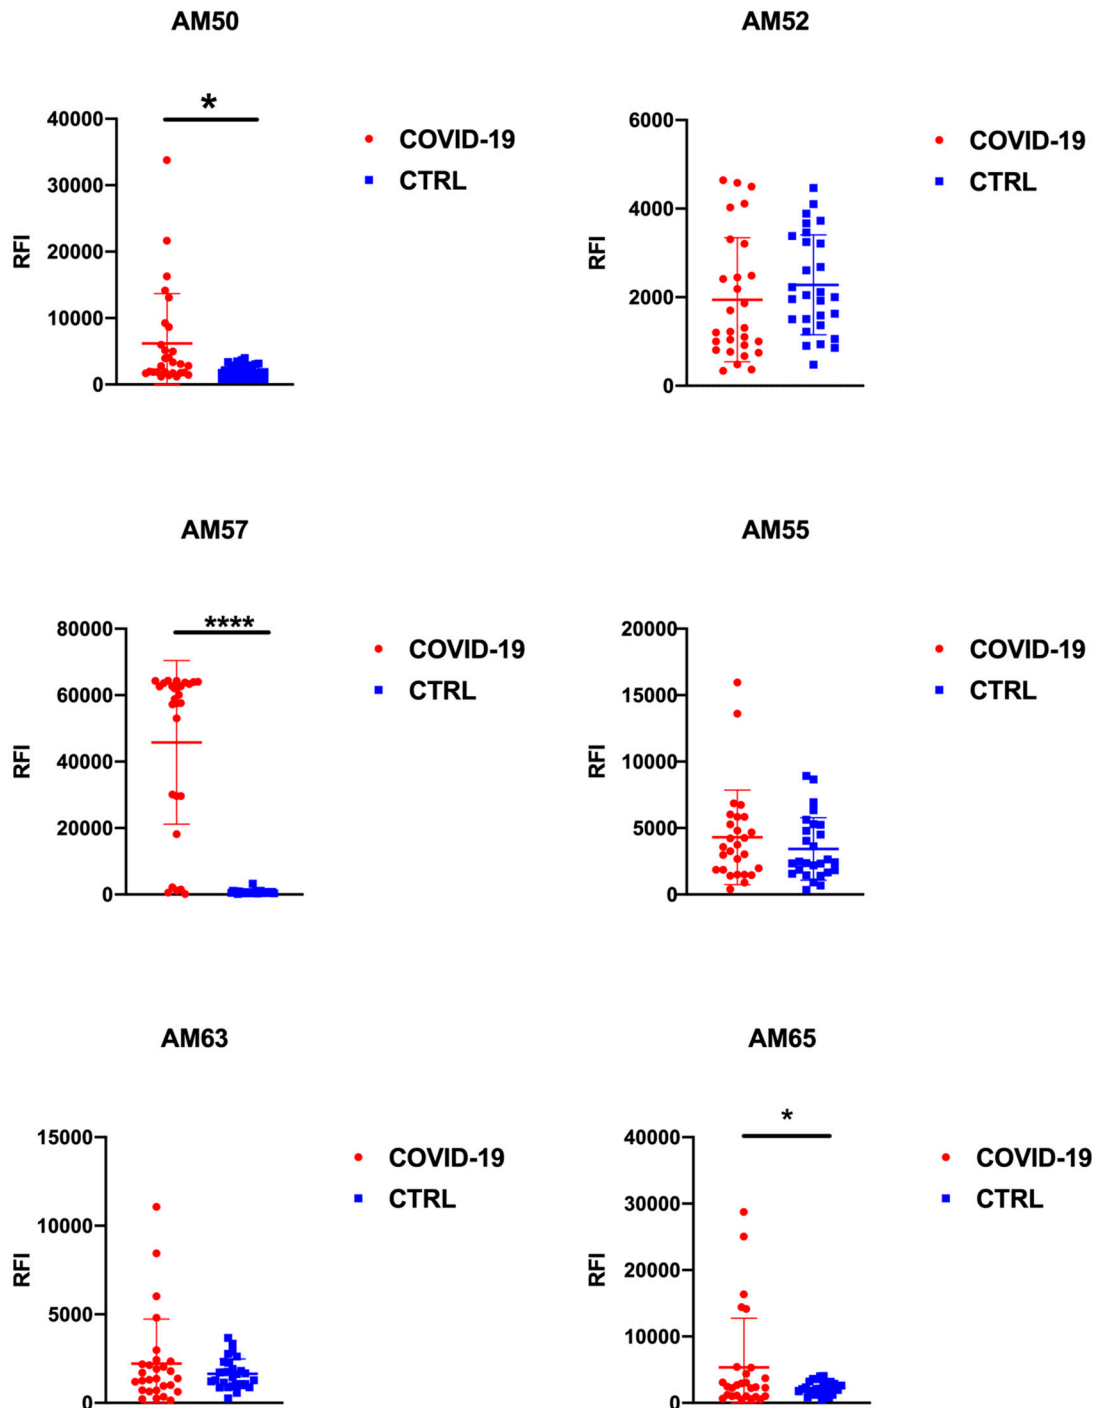

**Figure S1.** unpaired t-Test results for the peptide specific IgG. Peptide arrays displaying six peptide probes were probed with sera (N = 28) from COVID-19 patients and control patients (N = 28). Significant:  $p < 0.05$ ; \* =  $p < 0.05$ ; \*\*\* =  $p < 0.001$ ; \*\*\*\* =  $p < 0.0001$ .

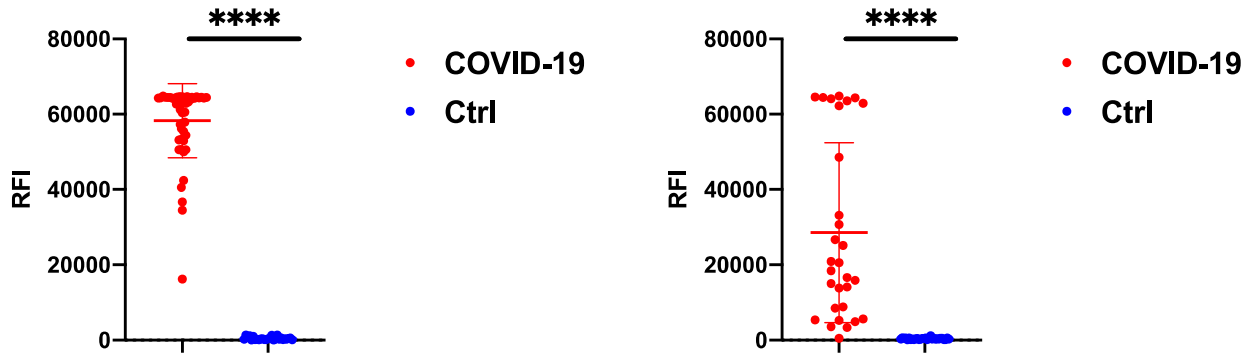

**Figure S2.** Left panel: IgG immunoreactivity on full N antigen. Right panel: IgM immunoreactivity on the full N antigen. \*\*\*\* =  $p < 0.0001$ .
